# Supplementary material for: Genomic diversity, linkage disequilibrium and selection signatures in European local pig breeds assessed with a high density SNP chip
Source: PubMed Central journal article supplement (PMC6753209; doi:10.1038/s41598-019-49830-6), 2019-09-19
Supplement: 41598_2019_49830_MOESM3_ESM.pdf [file 41598_2019_49830_MOESM3_ESM.pdf]

# **Genomic diversity, linkage disequilibrium and selection signatures in European local pig breeds assessed with a high density SNP chip**

Muñoz M, Bozzi R, García-Casco J, Núñez Y, Ribani A, Franci O, García F, Škrlep M, Schiavo G, Bovo S, Utzeri VJ, Charneca R, Martins JM, Quintanilla R, Tibau J, Margeta V, Djurkin-Kušec I, Mercat MJ, Riquet J, Estellé J, Zimmer C, Razmaite V, Araujo JP, Radović Č, Savić R, Karolyi D, Gallo M, Čandek-Potokar M, Fernández AI, Fontanesi L, Óvilo C

Supplementary Table 1. Minimum allele frequency (MAF) ranges computed for each SNP by breed.

| Breeds                        | MAF range values |           |           |           |           |           |           |           |           |           |
|-------------------------------|------------------|-----------|-----------|-----------|-----------|-----------|-----------|-----------|-----------|-----------|
|                               | 0.01-0.05        | 0.05-0.10 | 0.10-0.15 | 0.15-0.20 | 0.20-0.25 | 0.25-0.30 | 0.30-0.35 | 0.35-0.40 | 0.40-0.45 | 0.45-0.50 |
| Alentejana                    | 18244            | 5799      | 4522      | 4426      | 4660      | 3757      | 4750      | 5049      | 4934      | 4310      |
| Apulo Calabrese               | 10782            | 6265      | 5159      | 6400      | 4771      | 4537      | 5966      | 5169      | 5136      | 6266      |
| Basque                        | 20428            | 6186      | 5577      | 4785      | 4357      | 4194      | 3801      | 3959      | 3580      | 3584      |
| Bísara                        | 4129             | 4830      | 5257      | 5934      | 6339      | 6615      | 6988      | 7030      | 7049      | 6280      |
| Black Majorcan                | 12374            | 7783      | 5741      | 5274      | 5069      | 4078      | 5092      | 5267      | 5095      | 4678      |
| Black Slavonian               | 5343             | 5019      | 5382      | 5992      | 6057      | 6291      | 6468      | 6742      | 6965      | 6192      |
| Casertana                     | 8182             | 4818      | 5595      | 5497      | 6417      | 5599      | 6173      | 6433      | 5598      | 6139      |
| Cinta Senese                  | 8376             | 7955      | 8017      | 5990      | 6141      | 4516      | 4560      | 5233      | 4618      | 5045      |
| Gascon                        | 12187            | 5100      | 5576      | 5328      | 5183      | 4344      | 6206      | 5918      | 5532      | 5077      |
| Iberian                       | 16253            | 6189      | 4580      | 4567      | 4672      | 4704      | 4848      | 4872      | 5132      | 4634      |
| Krškopolje                    | 4917             | 4163      | 4981      | 5502      | 6195      | 6397      | 6808      | 7387      | 7595      | 6506      |
| Lithuanian indigenous wattle  | 8724             | 4566      | 5135      | 5731      | 5657      | 4924      | 6239      | 6659      | 6699      | 6117      |
| Swallow-Bellied Mangalitsa    | 19084            | 4918      | 4786      | 4540      | 4536      | 4579      | 4777      | 4673      | 4414      | 4144      |
| Mora Romagnola                | 22287            | 5509      | 6263      | 4934      | 4217      | 2712      | 3803      | 3723      | 3676      | 3327      |
| Moravka                       | 5222             | 4850      | 5733      | 5757      | 6062      | 6247      | 6836      | 6734      | 6930      | 6080      |
| Nero Siciliano                | 3600             | 5058      | 5854      | 6420      | 6332      | 6500      | 6562      | 6821      | 6937      | 6367      |
| Old type Lithuanian White     | 6759             | 4687      | 5085      | 5631      | 5937      | 5179      | 6875      | 7041      | 6929      | 6328      |
| Sarda                         | 1538             | 3499      | 4989      | 5929      | 6719      | 6788      | 7722      | 7909      | 8068      | 7290      |
| Schwäbisch-Hällisches Schwein | 6715             | 4552      | 4857      | 5315      | 5783      | 6305      | 6392      | 6651      | 7031      | 6850      |
| Turopolje                     | 29740            | 4808      | 4619      | 4418      | 3142      | 3344      | 2989      | 2521      | 2439      | 2431      |
| Wild Boar                     | 18229            | 6325      | 5938      | 233       | 6172      | 6405      | 174       | 6718      | 6834      | 3422      |

Supplementary Table 2. Genetic distances among the 21 breeds estimated using Nei's formula (1972).

|     | AL    | AP    | BA    | BI    | BS    | CA    | CS    | GA    | IB    | KR    | LIW   | MB    | MA    | MR    | MV    | NS    | OLW   | SA    | SW    | TU    |  |
|-----|-------|-------|-------|-------|-------|-------|-------|-------|-------|-------|-------|-------|-------|-------|-------|-------|-------|-------|-------|-------|--|
| AP  | 0.458 |       |       |       |       |       |       |       |       |       |       |       |       |       |       |       |       |       |       |       |  |
| BA  | 0.413 | 0.552 |       |       |       |       |       |       |       |       |       |       |       |       |       |       |       |       |       |       |  |
| BI  | 0.386 | 0.508 | 0.475 |       |       |       |       |       |       |       |       |       |       |       |       |       |       |       |       |       |  |
| BS  | 0.360 | 0.490 | 0.455 | 0.419 |       |       |       |       |       |       |       |       |       |       |       |       |       |       |       |       |  |
| CA  | 0.420 | 0.543 | 0.515 | 0.474 | 0.452 |       |       |       |       |       |       |       |       |       |       |       |       |       |       |       |  |
| CS  | 0.344 | 0.477 | 0.444 | 0.409 | 0.375 | 0.442 |       |       |       |       |       |       |       |       |       |       |       |       |       |       |  |
| GA  | 0.406 | 0.536 | 0.462 | 0.457 | 0.437 | 0.496 | 0.429 |       |       |       |       |       |       |       |       |       |       |       |       |       |  |
| IB  | 0.276 | 0.461 | 0.420 | 0.391 | 0.364 | 0.423 | 0.348 | 0.411 |       |       |       |       |       |       |       |       |       |       |       |       |  |
| KR  | 0.396 | 0.513 | 0.482 | 0.439 | 0.418 | 0.478 | 0.414 | 0.462 | 0.398 |       |       |       |       |       |       |       |       |       |       |       |  |
| LIW | 0.397 | 0.512 | 0.484 | 0.435 | 0.421 | 0.477 | 0.415 | 0.460 | 0.402 | 0.444 |       |       |       |       |       |       |       |       |       |       |  |
| MB  | 0.312 | 0.462 | 0.421 | 0.391 | 0.365 | 0.422 | 0.350 | 0.409 | 0.316 | 0.397 | 0.400 |       |       |       |       |       |       |       |       |       |  |
| MA  | 0.331 | 0.481 | 0.440 | 0.413 | 0.376 | 0.443 | 0.369 | 0.429 | 0.336 | 0.417 | 0.421 | 0.341 |       |       |       |       |       |       |       |       |  |
| MR  | 0.474 | 0.604 | 0.575 | 0.532 | 0.509 | 0.561 | 0.491 | 0.555 | 0.477 | 0.530 | 0.535 | 0.481 | 0.500 |       |       |       |       |       |       |       |  |
| MV  | 0.366 | 0.493 | 0.456 | 0.418 | 0.393 | 0.455 | 0.390 | 0.437 | 0.371 | 0.417 | 0.422 | 0.370 | 0.377 | 0.515 |       |       |       |       |       |       |  |
| NS  | 0.332 | 0.466 | 0.431 | 0.395 | 0.374 | 0.429 | 0.362 | 0.414 | 0.337 | 0.400 | 0.400 | 0.336 | 0.357 | 0.487 | 0.374 |       |       |       |       |       |  |
| OLW | 0.448 | 0.551 | 0.525 | 0.474 | 0.467 | 0.519 | 0.461 | 0.499 | 0.453 | 0.482 | 0.450 | 0.448 | 0.469 | 0.581 | 0.464 | 0.441 |       |       |       |       |  |
| SA  | 0.366 | 0.489 | 0.458 | 0.417 | 0.397 | 0.454 | 0.387 | 0.438 | 0.370 | 0.419 | 0.418 | 0.369 | 0.389 | 0.510 | 0.398 | 0.372 | 0.456 |       |       |       |  |
| SW  | 0.409 | 0.522 | 0.489 | 0.450 | 0.432 | 0.490 | 0.429 | 0.473 | 0.413 | 0.437 | 0.452 | 0.409 | 0.431 | 0.551 | 0.427 | 0.411 | 0.489 | 0.432 |       |       |  |
| TU  | 0.389 | 0.533 | 0.493 | 0.462 | 0.421 | 0.496 | 0.421 | 0.478 | 0.392 | 0.466 | 0.470 | 0.396 | 0.409 | 0.552 | 0.437 | 0.410 | 0.517 | 0.440 | 0.480 |       |  |
| WB  | 0.369 | 0.526 | 0.484 | 0.457 | 0.428 | 0.488 | 0.413 | 0.474 | 0.372 | 0.464 | 0.467 | 0.381 | 0.396 | 0.543 | 0.434 | 0.400 | 0.518 | 0.434 | 0.476 | 0.455 |  |

AL: Alentejana; : Apulo Calabrese; BA: Basque; BI: Bísara; BR: Black Slavonian; CA: Casertana; CS: Cinta Senese; GA: Gascon; IB: Iberian; KR: Krškopolje; LI: Lithuanian indigenous wattle; MB: Majorcan Black; MA: Swallow-Bellied Mangalitsa ; MR: Mora Romagnola; MV: Moravka; NS: Nero Siciliano; OW: Old type Lithuanian White; SA: Sarda; SW: Schwäbisch-Hällisches Schwein; TU: Turopolje; WB: Wild Boar.

Supplementary Table 3. SNPs used in LD decay analyses by population.

| Population                    | SNP    |
|-------------------------------|--------|
| Alentejana                    | 35,706 |
| Apulo Calabrese               | 41,909 |
| Basque                        | 33,987 |
| Bísara                        | 47,388 |
| Black Slavonian               | 46,579 |
| Casertana                     | 43,761 |
| Cinta Senese                  | 43,915 |
| Gascon                        | 40,828 |
| Iberian                       | 37,431 |
| Krškopolje                    | 47,561 |
| Lithuanian indigenous wattle  | 43,862 |
| Majorcan Black                | 40,666 |
| Swallow-Bellied Mangalitsa    | 35,980 |
| Mora Romagnola                | 32,118 |
| Moravka                       | 47,381 |
| Nero Siciliano                | 48,587 |
| Old type Lithuanian White     | 45,461 |
| Sarda                         | 49,464 |
| Schwäbisch-Hällisches Schwein | 45,506 |
| Turopolje                     | 27,339 |
| Wild Boar                     | 35,228 |
